# Supplementary material for: Consanguinity, pregnancy outcomes and offspring mortality in India: Evidences from National Family Health Survey, 2015-2021
Source: Research Square preprint supplement (doi:10.21203/rs.3.rs-3943393/v1), 2024-02-28
Supplement: Supplementary file 1 [file e3fef203117ff91f7a78bbb7.pdf]

## Supplementary Table

**Table S1: Adjusted odds ratio (AOR) estimated from binary logit regression for infant mortality by background characteristics, India 2015-21**

| <b>Background characteristics</b>     | <b>Model I<br/>OR [CI 95%]</b> | <b>Model II<br/>AOR [CI 95%]</b> | <b>Model III<br/>AOR [CI 95%]</b> | <b>Model IV<br/>AOR [CI 95%]</b> |
|---------------------------------------|--------------------------------|----------------------------------|-----------------------------------|----------------------------------|
| <b>Types of marriage</b>              |                                |                                  |                                   |                                  |
| Close consanguinity                   | 1.12***(1.06, 1.18)            | 1.12***(1.06, 1.18)              | 1.20***(1.11, 1.3)                | 1.17(0.95, 1.44)                 |
| Distant consanguinity                 | 1.17***(1.09, 1.24)            | 1.16***(1.09, 1.24)              | 1.27***(1.17, 1.39)               | 1.45***(1.17, 1.79)              |
| No consanguinity®                     |                                |                                  |                                   |                                  |
| <b>Sex of the child</b>               |                                |                                  |                                   |                                  |
| Male®                                 |                                |                                  |                                   |                                  |
| Female                                |                                | 0.86***(0.83, 0.88)              | 0.96*(0.92, 1.01)                 | 0.90*(0.80, 1.01)                |
| <b>Birth order/birth interval</b>     |                                |                                  |                                   |                                  |
| First Birth®                          |                                |                                  |                                   |                                  |
| Birth order 2-3/<24 months birth int. |                                | 1.14***(1.09, 1.19)              | 0.99(0.92, 1.06)                  | 0.75***(0.63, 0.91)              |
| Birth order 2-3/≥24 months birth int. |                                | 0.64***(0.61, 0.66)              | 0.70***(0.66, 0.74)               | 0.69***(0.60, 0.80)              |
| Birth order 4+/<24 months birth int.  |                                | 2.08***(1.96, 2.20)              | 2.08***(1.91, 2.27)               | 1.41***(1.12, 1.77)              |
| Birth order 4+/≥24 months birth int.  |                                | 1.06**(1, 1.12)                  | 1.28***(1.19, 1.37)               | 1.03(0.86, 1.25)                 |
| <b>Age at marriage</b>                |                                |                                  |                                   |                                  |
| Below 18®                             |                                |                                  |                                   |                                  |
| 18-24                                 |                                | 0.78***(0.75, 0.81)              | 0.86***(0.82, 0.9)                | 1.14**(1.01, 1.29)               |
| 25 & above                            |                                | 0.71***(0.66, 0.76)              | 0.78***(0.71, 0.86)               | 1.26*(0.99, 1.59)                |
| <b>ANC visits (≥4)</b>                |                                |                                  |                                   |                                  |
| No ®                                  |                                |                                  |                                   |                                  |
| Yes                                   |                                |                                  | 0.65***(0.62, 0.68)               | 0.83***(0.73, 0.94)              |
| <b>PNC within 2days</b>               |                                |                                  |                                   |                                  |
| No®                                   |                                |                                  |                                   |                                  |
| Yes                                   |                                |                                  | 0.85***(0.81, 0.89)               | 0.92(0.82, 1.04)                 |
| <b>Institutional Delivery</b>         |                                |                                  |                                   |                                  |
| No®                                   |                                |                                  |                                   |                                  |
| Yes                                   |                                |                                  | 0.85***(0.8, 0.91)                | 0.92(0.80, 1.07)                 |
| <b>Education</b>                      |                                |                                  |                                   |                                  |
| No education®                         |                                |                                  |                                   |                                  |
| Primary                               |                                |                                  |                                   | 0.88(0.74, 1.04)                 |
| Secondary                             |                                |                                  |                                   | 0.62***(0.53, 0.72)              |
| Higher                                |                                |                                  |                                   | 0.37***(0.27, 0.49)              |
| <b>Working Status</b>                 |                                |                                  |                                   |                                  |
| No®                                   |                                |                                  |                                   |                                  |
| Yes                                   |                                |                                  |                                   | 1.19**(1.04, 1.37)               |
| <b>Mass media exposure</b>            |                                |                                  |                                   |                                  |
| No ®                                  |                                |                                  |                                   |                                  |
| Yes                                   |                                |                                  |                                   | 1.23***(1.07, 1.41)              |
| <b>Religion</b>                       |                                |                                  |                                   |                                  |
| Hindu®                                |                                |                                  |                                   |                                  |
| Muslim                                |                                |                                  |                                   | 0.90(0.76, 1.07)                 |
| Others                                |                                |                                  |                                   | 1.02(0.75, 1.4)                  |
| <b>Caste</b>                          |                                |                                  |                                   |                                  |
| SC®                                   |                                |                                  |                                   |                                  |
| ST                                    |                                |                                  |                                   | 0.75***(0.61, 0.93)              |
| OBC                                   |                                |                                  |                                   | 1.12(0.97, 1.29)                 |
| Others                                |                                |                                  |                                   | 0.80**(0.66, 0.97)               |
| <b>Wealth Quintile</b>                |                                |                                  |                                   |                                  |
| Poorest®                              |                                |                                  |                                   |                                  |
| poorer                                |                                |                                  |                                   | 0.93(0.8, 1.09)                  |
| Middle                                |                                |                                  |                                   | 0.78***(0.65, 0.94)              |

|                           |            |            |            |                     |
|---------------------------|------------|------------|------------|---------------------|
| richer                    |            |            |            | 0.52***(0.41, 0.66) |
| Richest                   |            |            |            | 0.44***(0.33, 0.59) |
| <b>Types of family</b>    |            |            |            |                     |
| Non-Nuclear®              |            |            |            |                     |
| Nuclear                   |            |            |            | 0.99(0.87, 1.11)    |
| <b>Place of residence</b> |            |            |            |                     |
| Rural®                    |            |            |            |                     |
| Urban                     |            |            |            | 1.15*(0.99, 1.34)   |
| <b>Region</b>             |            |            |            |                     |
| North®                    |            |            |            |                     |
| Central                   |            |            |            | 1.14(0.94, 1.37)    |
| Eastern                   |            |            |            | 0.82*(0.67, 1.01)   |
| Northeast                 |            |            |            | 0.83(0.59, 1.17)    |
| Western                   |            |            |            | 0.70***(0.55, 0.9)  |
| South                     |            |            |            | 0.76***(0.60, 0.95) |
| Log likelihood            | -70501.282 | -68597.925 | -36372.247 | -5846.3731          |

\*\*\*p < 0.001; \*\*p < 0.01; \*p < 0.05

®Reference category
